# Supplementary material for: Gait characteristics in individuals with Parkinson’s disease during 1-minute treadmill walking
Source: PeerJ. 2020 Jun 29;8:e9463. doi: 10.7717/peerj.9463 (PMC7331622; doi:10.7717/peerj.9463)
Supplement: Supplemental Information 2 [file peerj-08-9463-s002.xlsx]

## Sheet: All
Subject_number	Group	Gender(M/F)	Age(year)	Height(cm)	Weight(Kg)	BMI(kg/m2)	Foot Size(mm)	Walking speed(m/s)	Cadence(beats/min)	Stride Length(m)	CV_stride_length(%)	Step Length(m)	CV_step_length(%)	Stance phase(%)	CV_Stance phase(%)	PCI(%)	GA(%)	UPDRS total	UPDRS Part III	H & Y stage	Disease duration(years)	LED dose (mm)	MOCA	MMSE
50s_1	1	1	52	177	95	30.3233	275	0.64344	102	0.76661	1.7376	0.383333	1.0351	61.9733	2.615	4.6028	0.361
50s_2	1	1	58	177	70.2	22.4074	265	0.863151	116	0.90339	1.40187	0.451695	0.7336	59.495	1.53963	2.1342	0.1264
50s_3	1	1	56	167	73.1	26.2111	260	0.815037	116	0.855928	0.993639	0.427964	0.5218	59.4457	1.51987	2.377	0.8351
50s_4	1	1	57	172.3	86.2	29.036	265	0.854453	116	0.904643	1.04179	0.452351	0.5515	60.3306	1.6887	8.6328	1.0257
50s_5	1	1	58	169.5	60.4	21.0231	250	0.737463	119	0.756637	2.0154	0.378289	1.0339	61.4911	2.13852	9.5556	2.1091
50s_6	1	1	55	167.7	76.9	27.3439	255	0.463791	110	0.507096	2.30935	0.253548	1.2625	62.2951	3.64539	10.3361	0.9195
50s_7	1	1	57	169.5	73.9	25.722	265	0.655523	84	0.78944	2.55185	0.39469	1.5366	63.5665	3.29891	3.1424	5.9719
50s_8	1	1	52	165.7	76.9	28.008	265	0.704084	111	0.778757	2.27879	0.389378	1.2602	62.0437	2.44989	3.1308	0.4421
50s_9	1	1	53	179.1	78.9	24.5972	270	0.465289	108	0.525237	5.73725	0.262647	3.2384	63.2368	7.77285	5.0969	0.4162
50s_10	1	1	50	175.7	80.2	25.9795	265	0.632391	109	0.714001	2.27977	0.356972	1.287	61.0118	3.47179	4.3339	0.9658
50s_11	1	1	59	157.4	57.8	23.3302	240	0.705916	121	0.716518	1.08617	0.358259	0.5513	61.8312	1.65337	2.6674	2.2959
50s_12	1	1	54	164	74.9	27.848	245	0.677507	120	0.690915	1.86135	0.345488	0.9491	61.4032	2.13474	5.6731	3.4865
50s_13	1	1	59	171.2	68	23.2007	265	0.48676	118	0.49889	2.34126	0.249416	1.1999	62.7011	3.71365	4.9633	0.8682
50s_14	1	1	55	179.5	81.2	25.2015	270	0.649954	118	0.674485	1.96095	0.337214	1.0175	60.8622	2.64384	4.6448	1.1596
50s_15	1	1	57	163.4	73.1	27.3787	260	0.713994	115	0.757222	1.11456	0.378641	0.591	61.0149	1.58355	2.8626	3.7724
50s_16	1	2	55	152.5	59.1	25.4125	230	0.765027	116	0.784656	1.97567	0.392328	1.0132	61.3582	2.42038	2.4855	0.7364
50s_17	1	2	55	150	51.3	22.8	230	0.703704	116	0.728267	1.36801	0.364133	0.7079	61.9088	1.88616	2.807	0.8492
50s_18	1	2	50	154.1	50.1	21.0976	240	0.612878	110	0.676119	1.65902	0.338092	0.9151	62.8014	2.77319	3.0713	5.8052
50s_19	1	2	53	160.8	78.8	30.4757	245	0.863737	125	0.844279	1.36783	0.422139	0.6685	62.4211	1.56117	2.1131	5.6439
50s_20	1	2	55	157	46.5	18.8649	225	0.725407	118	0.750382	2.34025	0.375159	1.2104	61.1092	3.04586	3.8648	0.6087
50s_21	1	2	57	158	52.8	21.1505	230	0.914205	122	0.915	1.19622	0.457468	0.5986	59.7968	1.43804	2.6599	0.5068
50s_22	1	2	52	152	51.9	22.4636	230	0.877193	128	0.835724	1.17985	0.417895	0.562	60.1828	1.63302	2.9631	0.9398
50s_23	1	2	51	159.3	69.5	27.3876	240	0.645184	110	0.720151	2.56511	0.360075	1.4315	62.1704	3.37025	4.2926	0.934
50s_24	1	2	51	161.3	57.2	21.985	250	0.58552	126	0.567948	3.36514	0.284005	1.6322	62.8021	4.46004	6.7283	4.6975
50s_25	1	2	56	153.2	58.2	24.7974	230	1.01538	128	0.965927	0.971646	0.482963	0.4621	58.6979	1.15285	2.2971	1.2392
50s_26	1	2	50	163	60	22.5827	235	0.698705	108	0.79319	1.98852	0.396564	1.1287	62.7139	2.36168	2.5801	5.91
50s_27	1	2	50	155.4	58.2	24.1002	230	0.643501	126	0.622008	1.65322	0.311004	0.799	61.5841	2.36327	2.8555	0.221
50s_28	1	2	50	158	56.9	22.7928	235	0.720816	105	0.835253	2.43875	0.417658	1.4129	61.8053	3.49857	3.1251	2.4682
50s_29	1	2	54	157.9	65.3	26.1908	240	0.70368	108	0.80304	2.00156	0.40152	1.1421	60.4146	3.42649	4.1811	6.5078
50s_30	1	2	50	160.2	59.2	23.0673	245	0.953669	125	0.936517	1.08096	0.468227	0.5307	59.0631	1.63571	2.3891	1.588
60s_1	2	1	61	174.1	72.4	23.8859	265	0.765843	126	0.74463	1.70067	0.372315	0.8268	59.6695	1.80779	3.0543	1.474
60s_2	2	1	60	166	69.9	25.3665	250	0.568942	131	0.532108	2.17919	0.266024	1.0191	62.4067	3.02564	3.9367	2.8484
60s_3	2	1	69	176	83.5	26.9564	275	0.599747	102	0.719091	3.81754	0.359545	2.2885	62.6553	5.00197	4.5471	0
60s_4	2	1	64	167.7	62.6	22.2591	265	0.662559	145	0.559094	2.59087	0.279547	1.0931	60.9108	2.65306	5.3572	0.9912
60s_5	2	1	66	173.5	86.4	28.7022	275	0.528338	96	0.674352	6.12669	0.337176	3.9098	63.4475	7.94531	8.4097	3.0291
60s_6	2	1	69	162.3	59	22.3983	265	0.513452	135	0.467899	1.89089	0.233949	0.8616	60.9995	2.64953	3.3135	0.6473
60s_7	2	1	63	170.1	79.8	27.58	265	0.587889	103	0.699001	2.68797	0.3495	1.598	64.0062	3.40311	2.5708	2.9137
60s_8	2	1	62	166.9	90	32.3095	260	0.416084	124	0.409107	3.11524	0.204554	1.5316	64.5364	3.9243	9.2128	3.7067
60s_9	2	1	61	166.5	65.3	23.5551	260	0.750751	118	0.778018	1.49741	0.389009	0.7759	61.7572	1.91832	2.6914	5.4277
60s_10	2	1	68	170	67.2	23.2526	275	0.408497	124	0.401235	2.46649	0.200588	1.2114	65.3148	2.95599	6.2619	3.3673
60s_11	2	1	62	165.6	64.8	23.6295	255	0.754831	114	0.806159	2.2824	0.40308	1.2188	59.9081	2.47563	2.8884	0.9814
60s_12	2	1	66	155.5	51.9	21.4638	250	0.821722	113	0.889582	1.54143	0.444823	0.8344	59.3055	1.93018	2.1539	0.0825
60s_13	2	1	62	155.6	55.3	22.8405	245	0.499857	99	0.617931	2.25469	0.308933	1.3936	64.2169	3.20508	4.8461	1.1478
60s_14	2	1	62	173	68.7	22.9543	260	0.610148	121	0.616879	1.66016	0.308439	0.8392	62.1078	2.02245	3.8632	5.473
60s_15	2	1	61	171	76	25.9909	275	0.60104	102	0.722105	3.70343	0.361053	2.2246	61.1687	6.6315	7.0735	7.2561
60s_16	2	1	69	168.2	65.5	23.152	260	0.858766	113	0.930975	1.01234	0.465458	0.5487	59.549	1.46921	2.1742	2.6965
60s_17	2	2	62	152	48	20.7756	225	0.548246	85	0.782632	2.54382	0.391316	1.8157	65.1138	5.05822	2.6898	1.939
60s_18	2	2	63	159.6	59.3	23.2803	245	0.661376	106	0.767043	1.4638	0.383521	0.8488	61.1158	2.21301	3.1204	2.2868
60s_19	2	2	69	158.4	71.6	28.5366	245	0.526094	87	0.741162	2.41948	0.370581	1.7044	62.2403	4.65984	5.0088	5.0787
60s_20	2	2	65	146	52.5	24.6294	235	0.380518	88	0.532534	2.43971	0.266301	1.7071	64.9355	4.61612	6.5805	4.7261
60s_21	2	2	64	156.6	59	24.0585	235	0.514403	113	0.557088	2.05435	0.278544	1.1123	63.3037	3.13978	3.4904	0.0466
60s_22	2	2	61	156.5	76.5	31.2344	250	0.532481	89	0.729776	4.02459	0.364856	2.758	63.8812	5.34915	4.7314	2.7306
60s_23	2	2	67	151.2	54.1	23.6643	230	0.496032	89	0.680026	3.93396	0.340013	2.6966	64.4495	4.84565	3.2407	5.3816
60s_24	2	2	65	154.3	54.4	22.849	230	0.360049	89	0.49838	4.57261	0.24919	3.1644	64.0695	7.8816	8.9974	5.4094
60s_25	2	2	65	153.5	46.7	19.8198	235	0.380022	126	0.368599	5.32259	0.1843	2.5815	63.7654	6.26547	6.4384	0.326
60s_26	2	2	63	158.9	62.3	24.674	245	0.524439	92	0.70107	4.97915	0.350535	3.3282	63.3798	5.38594	4.9251	0.3245
60s_27	2	2	65	144.3	53.4	25.6453	230	0.866251	126	0.842827	1.19666	0.421414	0.5821	57.6411	1.75743	3.8284	5.6036
60s_28	2	2	68	150.6	49	21.6046	225	0.774679	126	0.754117	1.14492	0.377025	0.5573	60.8959	1.51997	2.9275	1.4314
60s_29	2	2	65	152.9	77	32.9364	245	0.472349	89	0.64709	2.70785	0.323545	1.8549	64.894	3.58739	4.1628	4.042
60s_30	2	2	68	142	51.8	25.6893	225	0.782473	121	0.790282	1.99725	0.395141	1.0086	62.564	2.57832	4.3156	2.2131
70s_1	3	1	71	172	68.6	23.1882	265	0.516796	87	0.724012	2.31594	0.362035	1.6223	60.9331	4.33082	4.0071	3.6319
70s_2	3	1	72	157.8	62.3	25.0192	255	0.440079	94	0.569772	3.32727	0.284854	2.1541	61.6718	4.95316	6.9334	8.9906
70s_3	3	1	72	159	59.4	23.4959	255	0.541579	106	0.625031	1.70019	0.312516	0.9811	61.5528	2.15717	3.4448	1.2003
70s_4	3	1	73	174.2	66.1	21.7824	265	0.478377	107	0.546269	1.66345	0.273134	0.9498	62.6374	2.39426	2.7323	5.019
70s_5	3	1	76	167	82	29.4023	275	0.432468	109	0.484192	1.99681	0.242096	1.1179	64.9948	2.87238	4.313	3.976
70s_6	3	1	71	165.8	66.1	24.0454	260	0.586383	112	0.637515	1.3872	0.318758	0.7541	62.7321	1.63425	4.6305	0.7339
70s_7	3	1	71	166	60.5	21.9553	260	0.819946	113	0.885422	1.20201	0.442711	0.649	59.7325	1.87168	2.1756	0
70s_8	3	1	79	166.5	68.1	24.5651	255	0.750751	116	0.788288	1.04952	0.394174	0.551	59.2687	1.91298	2.8097	4.1344
70s_9	3	1	71	164.3	80.5	29.8209	260	0.642456	117	0.673524	1.88016	0.336762	0.9855	61.8634	2.23298	2.1763	1.9562
70s_10	3	1	71	161.5	77.1	29.5603	255	0.533196	121	0.540619	2.15872	0.270341	1.0944	62.3873	2.78518	5.1578	1.1618
70s_11	3	1	70	157	69.9	28.3581	245	0.7431	121	0.753503	1.63742	0.376752	0.8301	61.5542	2.29814	3.638	0.7491
70s_12	3	1	75	156.7	23	9.36677	240	0.531802	123	0.527377	7.02336	0.263689	3.4826	63.1345	8.11331	5.5736	3.0598
70s_13	3	1	74	174	76.2	25.1685	270	0.718391	124	0.708333	1.73895	0.354195	0.8573	60.9703	1.98835	9.3373	0.6954
70s_14	3	1	72	162	67.1	25.5677	260	0.548697	129	0.518951	5.1748	0.259506	2.4471	62.1248	7.21998	14.5393	5.1027
70s_15	3	1	77	153.6	63.2	26.7877	240	0.379774	133	0.349479	2.39894	0.17474	1.1039	62.5637	2.85101	4.6493	0.6275
70s_16	3	2	73	147.5	53.4	24.5447	225	0.508475	101	0.636	3.28949	0.318034	2.0572	64.2116	5.19112	4.6435	4.0974
70s_17	3	2	70	152.5	82.4	35.4313	245	0.546448	106	0.631016	2.56857	0.315475	1.4831	62.5403	3.93346	4.5374	2.9908
70s_18	3	2	73	147	72	33.3195	245	0.604686	106	0.697755	2.06708	0.348912	1.1926	63.6534	3.20784	5.0843	6.9959
70s_19	3	2	70	152.4	59.1	25.4459	235	0.546807	106	0.631496	3.00123	0.315748	1.7331	61.528	4.11439	4.8582	7.9418
70s_20	3	2	72	149.3	54.3	24.3602	240	0.55816	109	0.627194	1.95146	0.313597	1.0965	63.4263	2.78481	3.2312	2.7516
70s_21	3	2	73	155.4	61.9	25.6324	240	0.446875	111	0.494788	8.62559	0.247362	4.7755	64.1445	12.6307	13.6006	7.1406
70s_22	3	2	73	152.1	61.1	26.4109	235	0.675725	113	0.727416	2.26954	0.363708	1.2216	61.2076	2.96074	10.0599	3.8125
70s_23	3	2	70	147.7	73.1	33.5086	225	0.658241	113	0.709682	1.61709	0.354841	0.8717	63.3116	2.06581	2.7612	1.6675
70s_24	3	2	70	149.3	48.7	21.8479	225	0.632582	115	0.674481	5.28254	0.33724	2.8163	61.8179	5.97578	5.5901	0.1785
70s_25	3	2	72	147.9	66.5	30.4008	230	0.431974	120	0.439216	2.09344	0.219608	1.0643	66.4066	2.17042	3.9527	0.1513
70s_26	3	2	75	153	69.6	29.7322	245	0.344953	120	0.352288	4.64337	0.176144	2.3709	65.8112	6.28252	9.6087	1.6165
70s_27	3	2	73	154	65.5	27.6185	245	0.811688	123	0.804935	2.37869	0.402468	1.1795	61.9039	2.206	2.9586	0.0441
70s_28	3	2	73	152.7	58.3	25.0029	235	0.618497	126	0.600786	2.38324	0.300393	1.1576	61.6203	3.52416	4.9257	1.9539
70s_29	3	2	74	150.7	60.9	26.8158	235	0.51611	126	0.501526	1.33733	0.250763	0.6498	65.6039	2.1139	4.5224	2.2317
70s_30	3	2	70	160.4	71.7	27.8683	235	0.71003	133	0.652431	1.3065	0.326247	0.6002	64.4278	1.71743	2.8367	0.7501
PD_1	4	1	71	164	66.3	24.6505	250	0.203252	111	0.218049	2.70396	0.109024	1.4506	57.6102	4.30809	6.3928	2.9623	45.5	23.5	2.5	3.083	700	23	28
PD_2	4	1	66	171.9	73.7	24.9411	265	0.452459	140	0.385457	6.3534	0.192728	2.7062	59.4835	8.32231	16.6809	1.838	75.5	48.5	2	7.083	112.5	16	24
PD_3	4	1	60	168.6	62.5	21.9869	260	0.329511	76	0.514413	3.67485	0.257177	2.8682	65.9626	6.85707	5.1815	5.7808	54	48	2	6.083	400	25	29
PD_4	4	2	66	152.6	53.1	22.8027	240	0.163827	104	0.188073	4.67988	0.0940367	2.6862	59.1289	9.3215	12.5512	2.4536	51	36	3	1.917	880	23	26
PD_5	4	2	71	151	60.6	26.5778	245	0.110375	121	0.109007	13.9342	0.0545033	6.8794	56.6729	16.3014	11.115	6.4699	81.5	50.5	2.5	8.083	1300	23	29
PD_6	4	2	68	151	57.8	25.3498	240	0.183959	96	0.22894	4.33808	0.114503	2.6992	69.1111	7.37494	12.0949	5.3422	43	28	2.5~3	4.083	620	22	29
PD_7	4	1	51	174	65	21.4692	270	0.159642	88	0.215575	12.2627	0.107759	8.2789	69.032	22.8865	16.6971	7.3253	74	50	3	7.083	700	28	30
PD_8	4	2	68	153	57.4	24.5205	240	0.0907771	151	0.0713725	4.8526	0.0356863	1.9075	59.047	6.02215	9.9338	3.927	90.5	56.5	3	8.083	720	24	29
PD_9	4	1	76	170	84.1	29.1003	265	0.130719	102	0.152882	2.00835	0.0764706	1.1746	61.3543	3.71042	4.3898	4.8503	61.5	32.5	2	3.083	420	21	27
PD_10	4	2	70	148	59.7	27.2553	235	0.131381	117	0.133581	3.84926	0.0667568	1.9573	56.232	6.32754	12.0355	16.1995	53.5	34.5	2.5	5.083	300	18	22
PD_11	4	2	56	149.1	79.3	35.6712	250	0.130412	77	0.202414	9.48322	0.101207	7.3612	76.8025	18.0945	18.759	2.5205	69	34	2.5	6.083	495	25	24
PD_12	4	2	63	153.6	59.8	25.3465	245	0.108507	147	0.091862	7.424	0.0458984	3.1419	64.3038	6.34457	27.0063	17.5204	97.5	52.5	2.5	3.417	300	23	29
PD_13	4	1	77	161.5	70.2	26.9149	260	0.223598	116	0.231889	8.58965	0.115975	4.4542	60.5548	10.8728	19.358	11.9661	83	47	2	5.083	862.5	15	24
PD_14	4	1	70	166.7	58.3	20.9796	260	0.183297	123	0.177924	4.56556	0.0889622	2.2156	63.1143	5.04228	18.7089	9.8884	65	35	2	5.083	880	25	30
PD_15	4	2	69	148.2	50.3	22.9019	240	0.374869	103	0.434076	1.37108	0.217072	0.7937	64.8877	2.54193	3.6136	10.1736	54	26	2	10.083	520	22	30
PD_16	4	2	76	152.6	65.3	28.0417	250	0.145624	106	0.16422	5.74714	0.0821101	3.2409	61.5686	8.44213	13.7076	8.1782	32	24	2	11.083	375	22	29
PD_17	4	2	70	152.1	58	25.0709	240	0.219154	109	0.238988	6.50746	0.119461	3.5486	60.7846	9.29791	23.3854	5.8408	75.5	43.5	2	14.083	1000	19	27
PD_18	4	1	52	172	80.5	27.2107	260	0.452196	82	0.658372	1.36335	0.329186	0.9925	60.388	2.80503	3.5172	4.2956	58	40	2	3.083	700	29	30
PD_19	4	1	79	162.6	62.4	23.6017	270	0.136668	116	0.140713	2.74662	0.0703567	1.4141	58.0678	5.3856	7.5759	0.1201	50	35	2	5.667	620	22	27
PD_20	4	2	60	147.7	52	23.8365	235	0.206876	88	0.280704	2.06372	0.140352	1.3999	68.2262	5.79631	8.4947	3.7581	62.5	37.5	2.5	4.083	700	20	27
PD_21	4	2	71	149.2	54.6	24.5276	245	0.0930891	129	0.086059	4.39342	0.0430295	2.0306	66.0524	6.29031	17.6859	0.3492	78	61	3	5.667	720	19	27
PD_22	4	1	59	169.5	64.8	22.5546	260	0.213045	95	0.267375	6.82226	0.133687	4.2812	64.7508	12.0829	15.0027	12.5078	76.5	55.5	2	6.083	75	26	29
PD_23	4	2	69	154.1	59.7	25.1402	240	0.126181	111	0.134912	1.97635	0.0674886	1.0568	59.8708	3.53945	4.8257	1.2213	63.5	41.5	2	11.083	1000	24	28
PD_24	4	2	63	156	64.1	26.3396	245	0.302707	91	0.397564	3.95782	0.198782	2.5992	67.7834	6.66682	8.3169	8.3592	60.5	43.5	2	1.833	450	23	26
PD_25	4	1	60	161	81.3	31.3645	255	0.517598	129	0.477267	5.9589	0.238634	2.7474	63.8197	7.75685	12.8084	1.303	57	30	2	4.083	800	29	30
PD_26	4	2	65	147.8	43.6	19.9589	225	0.131559	119	0.132206	4.16239	0.0661028	2.0919	63.0354	6.48366	8.4093	2.6116	87.5	47.5	3	4.083	855	26	28
50s: 50-59 years	1: Aged 50s	1: Male
60s: 60-69 years	2: Aged 60s	2: Female
70s: 70-79 years	3: Aged 70s
PD: Parkinson's Disease	4: patients with PD
